# Supplementary material for: Near-Infrared Radiation-Based Mild Photohyperthermia Therapy of Non-Melanoma Skin Cancer with PEGylated Reduced Nanographene Oxide
Source: PubMed Central journal article supplement (PMC7466052; doi:10.3390/polym12081840), 2020-08-17
Supplement: polymers-12-01840-s001.pdf [file polymers-12-01840-s001.pdf]

## SUPPORTING INFORMATION

# Near-Infrared Radiation-Based Mild Photohyperthermia Therapy of Non-Melanoma Skin Cancer with PEGylated Reduced Nanographene Oxide

**Raquel Costa-Almeida**<sup>1,2,†</sup>, **Diana Bogas**<sup>3,†</sup>, **José R. Fernandes**<sup>4</sup>, **Licinia Timochenco**<sup>3</sup>,  
**Filipa A. L. S. Silva**<sup>1,2</sup>, **João Meneses**<sup>3</sup>, **Inês C. Gonçalves**<sup>1,2</sup>, **Fernão D. Magalhães**<sup>3</sup> and  
**Artur M. Pinto**<sup>1,2,3,\*</sup>

<sup>1</sup> i3S—Instituto de Investigação e Inovação em Saúde, Universidade do Porto, Porto 4200-180, Portugal; rcalmeida@i3s.up.pt (R.C.-A.); flsilva@i3s.up.pt (F.A.L.S.S.) icaastro@ineb.up.pt (I.C.G.)

<sup>2</sup> INEB—Instituto de Engenharia Biomédica, Universidade do Porto, Rua Alfredo Allen, 208, Porto 4200-180, Portugal

<sup>3</sup> LEPABE, Faculdade de Engenharia, Universidade do Porto, Porto 4200-180, Portugal; dianabogas@fe.up.pt (D.B.); up201809122@fe.up.pt (L.T.); up201503132@fe.up.pt (J.M.); fdmagalh@fe.up.pt (F.D.M.)

<sup>4</sup> CQVR—Centro de Química Vila Real, Departamento de Física, ECT, Universidade de Trás-os-Montes e Alto Douro, Vila Real, Portugal 5001-801; jraf@utad.pt

\* Correspondence: arturp@fe.up.pt

† These author contributed equally to this work.

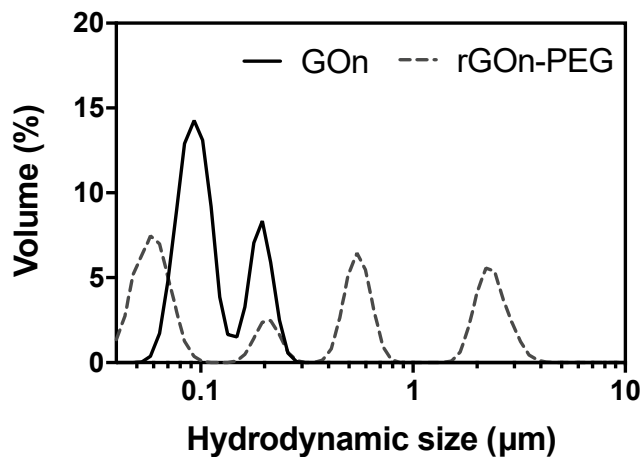

**Figure S1.** Volume distribution of particle size of GOn and rGOn-PEG dispersed in water at an initial concentration of  $250 \mu\text{g mL}^{-1}$  and determined by light scattering using a Coulter counter. A boxplot, which is a standardized way of displaying the dataset based on a five-number summary (the minimum, the maximum, the sample median, and the first and third quartiles) is presented in Figure 2C.

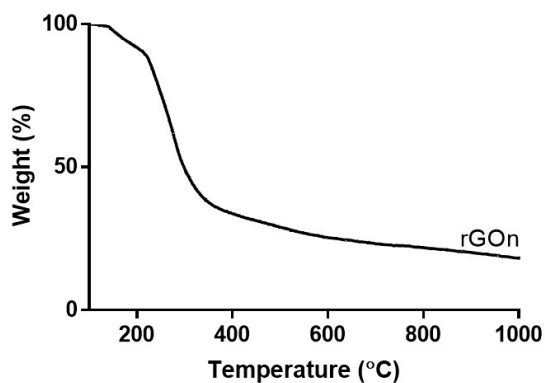

**Figure S2.** TGA curve of rGOn and weight loss.

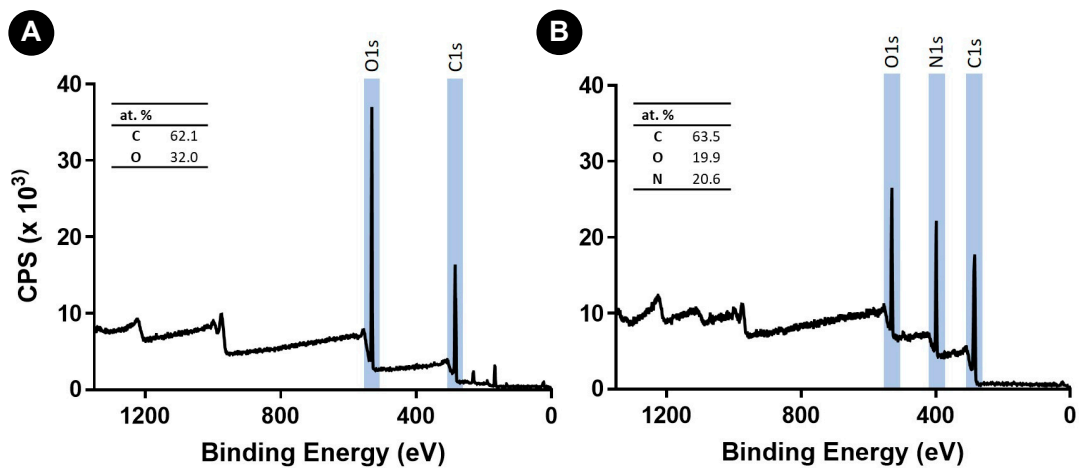

Figure S3. XPS survey spectra and atomic composition for (A) GO and (B) rGO-PEG.

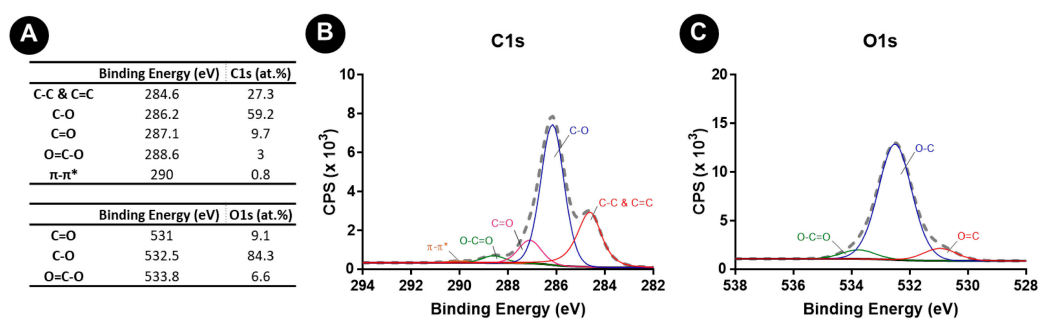

Figure S4. Surface chemical properties of rGO. (A) Atomic composition of rGO and content of C 1s and O 1s chemical groups resulting from spectra fitting; (B, C) Deconvolution of high-resolution (B) C 1s and (C) O 1s XPS spectra.

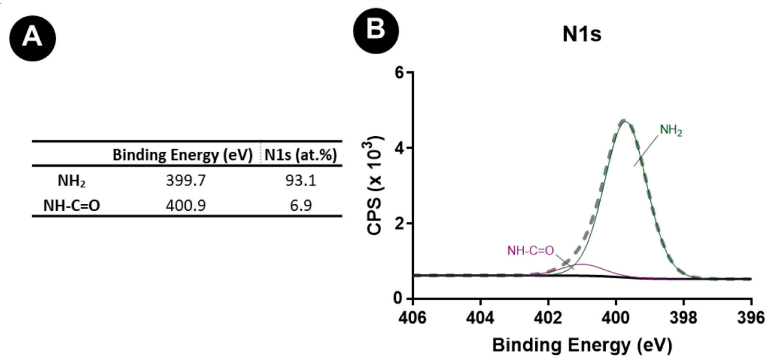

Figure S5. Quantification of functionalization of rGO-PEG. (A) Content of N 1s chemical groups resulting from spectra fitting; (B) Deconvolution of high-resolution N 1s XPS spectra.
